# Supplementary material for: Spatial distribution, genetic analysis, and population structure of the invasive Anopheles stephensi in Kenya: 2022-2024
Source: Research Square preprint supplement (doi:10.21203/rs.3.rs-5376784/v1), 2024-11-13

## Additional File 1

| month | year | county   | Sub county | Site name    | latitude  | longitude  | Stage collected             | Collection method | Location | <i>An. stephensi</i> | <i>An. arabiensis</i> | Other anophelids | culicines present |
|-------|------|----------|------------|--------------|-----------|------------|-----------------------------|-------------------|----------|----------------------|-----------------------|------------------|-------------------|
| Dec   | 2022 | Marsabit | Saku       | Karare       | 2.2270911 | 37.9380761 | Inmatures (larvae or pupae) | Dipping method    |          | 7                    | 6                     | 7                | no                |
| Dec   | 2022 | Marsabit | Saku       | Nagayo       | 2.3376659 | 37.9900449 | Inmatures (larvae or pupae) | Dipping method    |          | 3                    | 0                     | 0                | no                |
| Dec   | 2022 | Marsabit | Laisamis   | Laisamis     | 1.5876757 | 37.8081901 | Inmatures (larvae or pupae) | Dipping method    |          | 9                    | 0                     | 4                | no                |
| Dec   | 2022 | Turkana  | Lodwar     | Lodwar town  | 3.1217101 | 35.6277232 | Inmatures (larvae or pupae) | Dipping method    |          | 5                    | NA                    | NA               | NA                |
| Feb   | 2023 | Marsabit | Moyale     | Kinisa       | 3.4781614 | 39.1266442 | Adults                      | UVLT              | Indoors  | 1                    | 1                     |                  | yes               |
| Feb   | 2023 | Marsabit | Moyale     | Kinisa       | 3.4778131 | 39.1270866 | Inmatures (larvae or pupae) | Dipping method    |          | 2                    | 47                    | 0                | yes               |
| Feb   | 2023 | Marsabit | Laisamis   | Sambamba     | 1.5876541 | 37.8083263 | Inmatures (larvae or pupae) | Dipping method    |          | 4                    | 23                    |                  | yes               |
| Feb   | 2023 | Marsabit | Saku       | Saku Central | 2.3222611 | 37.9829043 | Inmatures (larvae or pupae) | Dipping method    |          | 8                    | 0                     | 0                | yes               |
| Feb   | 2023 | Marsabit | Laisamis   | Sedaimur     | 1.5992355 | 37.8147148 | Adults                      | UVLT              | Indoors  | 1                    | 8                     | 2                | yes               |

|     |      |                 |               |              |           |            |                             |                |          |   |    |    |     |
|-----|------|-----------------|---------------|--------------|-----------|------------|-----------------------------|----------------|----------|---|----|----|-----|
| Feb | 2023 | Marsabit        | Saku          | Saku Central | 2.3291914 | 37.9885602 | Adults                      | UVLT           | Outdoors | 6 | 0  | 0  | yes |
| May | 2023 | Marsabit        | Laisamis      | Kargi        | 2.5186342 | 37.588699  | Inmatures (larvae or pupae) | Dipping method |          | 6 | NA | NA | no  |
| Jun | 2023 | Elgeyo Marakwet | Marakwet West | Aror         | 0.9525    | 35.616003  | Inmatures (larvae or pupae) | Dipping method |          | 2 | NA | NA | NA  |
| Aug | 2023 | Mandera         | Mandera East  | Bulla Nguvu  | 3.9362739 | 41.8588979 | Inmatures (larvae or pupae) | Dipping method |          | 2 | NA | NA | yes |
| Aug | 2023 | Mandera         | Mandera East  | Bulla Nguvu  | 3.9362739 | 41.8588979 | Adults                      | CDC-LT         | Indoors  | 4 | NA | NA | NA  |
| Aug | 2023 | Mandera         | Mandera East  | Taifa        | 3.9362668 | 41.8588776 | Adults                      | CDC-LT         | Indoors  | 7 | NA | NA | yes |
| Aug | 2023 | Mandera         | Mandera East  | Taifa        | 3.9362615 | 41.8589    | Adults                      | UVLT           | Outdoors | 3 | NA | NA | yes |
| Aug | 2023 | Mandera         | Mandera East  | Taifa        | 3.9362881 | 41.85887   | Adults                      | Aspiration     | Indoors  | 3 | NA | NA | NA  |
| Aug | 2023 | Mandera         | Mandera East  | Neboi        | 3.9362488 | 41.8589963 | Inmatures (larvae or pupae) | Dipping method |          | 3 | NA | NA | no  |

|     |      |          |              |                   |           |            |                             |                |          |  |   |     |    |     |
|-----|------|----------|--------------|-------------------|-----------|------------|-----------------------------|----------------|----------|--|---|-----|----|-----|
| Aug | 2023 | Samburu  | Samburu East | Archers           | 0.6269341 | 37.6471042 | Inmatures (larvae or pupae) | Dipping method |          |  | 1 | NA  | NA | yes |
| Aug | 2023 | Samburu  | Samburu East | Lkumi             | 0.6288283 | 37.6390992 | Adults                      | Aspiration     | Indoors  |  | 6 | NA  | NA | NA  |
| Aug | 2023 | Samburu  | Samburu East | Lkumi             | 0.6288283 | 37.6390992 | Inmatures (larvae or pupae) | Dipping method |          |  | 2 | NA  | NA | NA  |
| Oct | 2023 | Marsabit | Moyale       | Dadache Lakole    | 3.4643891 | 38.9082907 | Adults                      | UVLT           | Outdoors |  | 0 | 1   | 0  | no  |
| Oct | 2023 | Marsabit | Moyale       | Kinisa            | 3.4787491 | 39.1226609 | Adults                      | HLC            | Outdoors |  | 0 | 14  | 0  | no  |
| Oct | 2023 | Marsabit | Moyale       | Kinisa            | 3.479595  | 39.1208058 | Inmatures (larvae or pupae) | Dipping method |          |  | 0 | 108 | 10 | yes |
| Oct | 2023 | Marsabit | Laisamis     | Laisamis Old Town | 1.5875054 | 37.8072657 | Inmatures (larvae or pupae) | Dipping method |          |  | 0 | 3   | 77 | yes |
| Feb | 2024 | Marsabit | Saku         | Shauri Yako       | 2.3291289 | 37.9958905 | Inmatures (larvae or pupae) | Dipping method |          |  | 7 | 0   | 0  | no  |

|     |      |          |          |             |           |            |                             |                |          |    |    |     |     |
|-----|------|----------|----------|-------------|-----------|------------|-----------------------------|----------------|----------|----|----|-----|-----|
| Feb | 2024 | Marsabit | Saku     | Shauri Yako | 2.3313384 | 37.9979865 | Inmatures (larvae or pupae) | Dipping method |          | 1  | NA | NA  | yes |
| Feb | 2024 | Marsabit | Saku     | Songa       | 2.2355433 | 38.003717  | Inmatures (larvae or pupae) | Dipping method |          | 1  | 0  | 0   | yes |
| Feb | 2024 | Marsabit | Saku     | Milimani    | 2.2417261 | 37.9966094 | Inmatures (larvae or pupae) | Dipping method |          | 1  | 0  | 0   | yes |
| Feb | 2024 | Marsabit | Laisamis | Sakaldara   | 1.6340135 | 37.8138081 | Inmatures (larvae or pupae) | Dipping method |          | 1  | 18 | 0   | yes |
| Feb | 2024 | Marsabit | Moyale   | Sololo      | 3.5474508 | 38.6479898 | Adults                      | CDC-LT         | Outdoors | 1  | 13 | 9   | no  |
| Feb | 2024 | Marsabit | Saku     | Songa       | 2.2438008 | 38.0034277 | Adults                      | BGS            | Outdoors | 1  | 3  | 3   | yes |
| Jun | 2024 | Isiolo   | Isiolo   | Isiolo Town | 0.3563364 | 37.5834123 | Inmatures (larvae or pupae) | Dipping method |          | 13 | NA | 222 | yes |
| Jun | 2024 | Isiolo   | Isiolo   | Isiolo Town | 0.3556743 | 37.5809335 | Inmatures (larvae or pupae) | Dipping method |          | 7  | NA | 670 | yes |

|     |      |         |               |               |           |            |                             |                |                      |   |    |    |    |
|-----|------|---------|---------------|---------------|-----------|------------|-----------------------------|----------------|----------------------|---|----|----|----|
| Apr | 2024 | Turkana | Turkana South | Achukule      | 2.3810033 | 35.6443984 | Inmatures (larvae or pupae) | Dipping method | Buckets              | 2 | NA | NA | NA |
| Apr | 2024 | Turkana | Turkana South | Morongor      | 2.378317  | 36.6392249 | Inmatures (larvae or pupae) | Dipping method | Tire                 | 1 | NA | NA | NA |
| Apr | 2024 | Turkana | Turkana South | Narengelu p B | 2.3791435 | 35.6540393 | Inmatures (larvae or pupae) | Dipping method | Above ground cistern | 1 | NA | NA | NA |
| Apr | 2024 | Turkana | Turkana South | Narengelu p B | 2.3877383 | 35.6511883 | Inmatures (larvae or pupae) | Dipping method | Barrels and drums    | 1 | NA | NA | NA |
| Apr | 2024 | Turkana | Turkana South | Narengelu p B | 2.37959   | 35.652975  | Inmatures (larvae or pupae) | Dipping method | Jerry cans           | 1 | NA | NA | NA |
| Apr | 2024 | Turkana | Turkana South | Narengelu p C | 2.3758581 | 35.6545078 | Inmatures (larvae or pupae) | Dipping method | Above gound tank     | 6 | NA | NA | NA |
| Apr | 2024 | Turkana | Turkana South | Narengelu p C | 2.3758897 | 35.6543644 | Inmatures (larvae or pupae) | Dipping method | Jerry cans           | 2 | NA | NA | NA |

|     |      |         |               |              |           |            |                             |                |                   |   |    |    |    |
|-----|------|---------|---------------|--------------|-----------|------------|-----------------------------|----------------|-------------------|---|----|----|----|
| Apr | 2024 | Turkana | Turkana South | Naulikalale  | 2.3754415 | 35.6565168 | Inmatures (larvae or pupae) | Dipping method | Above ground tank | 2 | NA | NA | NA |
| Apr | 2024 | Turkana | Turkana South | Town Chini   | 2.3826496 | 35.6542157 | Inmatures (larvae or pupae) | Dipping method | Drain             | 1 | NA | NA | NA |
| Mar | 2024 | Turkana | Turkana South | Achukule     | 2.38098   | 35.6447783 | Inmatures (larvae or pupae) | Dipping method | Barrels and drums | 1 | NA | NA | NA |
| Mar | 2024 | Turkana | Turkana South | Achukule     | 2.3715267 | 35.6831367 | Inmatures (larvae or pupae) | Dipping method | Buckets           | 1 | NA | NA | NA |
| Mar | 2024 | Turkana | Turkana South | Narengulup B | 2.3877383 | 35.6511883 | Inmatures (larvae or pupae) | Dipping method | Barrels and drums | 1 | NA | NA | NA |
| Mar | 2024 | Turkana | Turkana South | Narengulup B | 2.3798264 | 35.6531073 | Inmatures (larvae or pupae) | Dipping method | Jerry cans        | 2 | NA | NA | NA |
| Mar | 2024 | Turkana | Turkana South | Narengulup C | 2.3812863 | 35.6548309 | Inmatures (larvae or pupae) | Dipping method | Above ground tank | 5 | NA | NA | NA |

|     |      |         |               |              |           |            |                             |                |            |   |    |    |    |
|-----|------|---------|---------------|--------------|-----------|------------|-----------------------------|----------------|------------|---|----|----|----|
| Mar | 2024 | Turkana | Turkana South | Narengulup C | 2.3745291 | 35.6563255 | Inmatures (larvae or pupae) | Dipping method | Jerry cans | 1 | NA | NA | NA |
| Mar | 2024 | Turkana | Turkana South | Town Chini   | 2.382686  | 35.6544527 | Inmatures (larvae or pupae) | Dipping method | Drain      | 1 | NA | NA | NA |

## Additional File 2

| Collection Site | Sample ID   | Collection Method      | Collection Date | Species              | COI Haplotype |
|-----------------|-------------|------------------------|-----------------|----------------------|---------------|
| <b>Marsabit</b> | 2023KEN0074 | Adult                  | Dec-22          | <i>An. stephensi</i> | Hap 2         |
|                 | 2023KEN0083 | Adult                  | Dec-22          | <i>An. stephensi</i> | Hap 2         |
|                 | 2023KEN0097 | Larvae                 | May-23          | <i>An. stephensi</i> | Hap 2         |
|                 | 2023KEN0098 | Larvae                 | May-23          | <i>An. stephensi</i> | Hap 2         |
|                 | 2023KEN0101 | Larvae                 | May-23          | <i>An. stephensi</i> | Hap 2         |
|                 | 2023KEN0103 | Larvae                 | May-23          | <i>An. stephensi</i> | Hap 2         |
|                 | 2023KEN0109 | Larvae                 | May-23          | <i>An. stephensi</i> | Hap 3         |
|                 | 2023KEN0111 | Larvae                 | May-23          | <i>An. stephensi</i> | Hap 2         |
|                 | OR607949    |                        | Dec-22          | <i>An. stephensi</i> | Hap 3         |
|                 | OR607950    |                        | Dec-22          | <i>An. stephensi</i> | Hap 2         |
| <b>Mandera</b>  | 2023KEN0007 | Light Trap<br>Indoors  | 04-Aug-23       | <i>An. stephensi</i> | Hap 2         |
|                 | 2023KEN0011 | Light Trap<br>Indoors  | 06-Aug-23       | <i>An. stephensi</i> | Hap 2         |
|                 | 2023KEN0020 | Light Trap<br>Indoors  | 04-Aug-23       | <i>An. stephensi</i> | Hap 2         |
|                 | 2023KEN0021 | Prokopack              | 04-Aug-23       | <i>An. stephensi</i> | Hap 2         |
|                 | 2023KEN0022 | Light Trap<br>Indoors  | 04-Aug-23       | <i>An. stephensi</i> | Hap 2         |
|                 | 2023KEN0032 | Adult                  | 01-Aug-23       | <i>An. stephensi</i> | Hap 2         |
|                 | 2023KEN0037 | Light Trap<br>Outdoors | 04-Aug-23       | <i>An. stephensi</i> | Hap 2         |
|                 | 2023KEN0044 | Light Trap<br>Indoors  | 04-Aug-23       | <i>An. stephensi</i> | Hap 2         |
|                 | 2023KEN0047 | Light Trap<br>Indoors  | 06-Aug-23       | <i>An. stephensi</i> | Hap 2         |
|                 | 2023KEN0050 | Prokopack              | 04-Aug-23       | <i>An. stephensi</i> | Hap 2         |

|                |             |                       |           |                          |       |
|----------------|-------------|-----------------------|-----------|--------------------------|-------|
|                | 2023KEN0052 | Light Trap<br>Indoors | 04-Aug-23 | <i>An.<br/>stephensi</i> | Hap 2 |
|                | 2023KEN0057 | Light Trap<br>Indoors | 06-Aug-23 | <i>An.<br/>stephensi</i> | Hap 2 |
|                | 2023KEN0062 | Light Trap<br>Indoors | 06-Aug-23 | <i>An.<br/>stephensi</i> | Hap 2 |
| <b>Samburu</b> | 2023KEN0016 | Adult                 | 04-Aug-23 | <i>An.<br/>stephensi</i> | Hap 3 |
|                | 2023KEN0023 | Prokopack             | 03-Aug-23 | <i>An.<br/>stephensi</i> | Hap 2 |
|                | 2023KEN0026 | Larvae                | 02-Aug-23 | <i>An.<br/>stephensi</i> | Hap 2 |
|                | 2023KEN0029 | Prokopack             | 03-Aug-23 | <i>An.<br/>stephensi</i> | Hap 2 |
|                | 2023KEN0031 | Prokopack             | 04-Aug-23 | <i>An.<br/>stephensi</i> | Hap 2 |
|                | 2023KEN0041 | Prokopack             | 03-Aug-23 | <i>An.<br/>stephensi</i> | Hap 2 |
|                | 2023KEN0045 | Prokopack             | 03-Aug-23 | <i>An.<br/>stephensi</i> | Hap 2 |
| <b>Turkana</b> | 2024KEN0002 | Larvae                | May-24    | <i>An.<br/>stephensi</i> | Hap 2 |
|                | Barcode32   | NA                    | 2024      | <i>An.<br/>stephensi</i> | Hap 1 |
|                | Barcode48   | NA                    | 2024      | <i>An.<br/>stephensi</i> | Hap 1 |
|                | KE9N6B      | Larvae                | Apr-24    | <i>An.<br/>stephensi</i> | Hap 2 |
|                | KE9N6D      | Larvae                | Apr-24    | <i>An.<br/>stephensi</i> | Hap 2 |
|                | KE9N6F      | Larvae                | Apr-24    | <i>An.<br/>stephensi</i> | Hap 2 |
|                | KE9N6M      | Larvae                | Apr-24    | <i>An.<br/>stephensi</i> | Hap 2 |
|                | KE9N6U      | Larvae                | Apr-24    | <i>An.<br/>stephensi</i> | Hap 2 |
|                | KE9N9C      | Larvae                | Apr-24    | <i>An.<br/>stephensi</i> | Hap 2 |
|                | KE9NAW      | Larvae                | Apr-24    | <i>An.<br/>stephensi</i> | Hap 2 |
|                | KE9NB6      | Larvae                | Apr-24    | <i>An.<br/>stephensi</i> | Hap 2 |
|                | KE9NB7      | Larvae                | Apr-24    | <i>An.<br/>stephensi</i> | Hap 2 |
|                | KE9NBV      | Larvae                | Apr-24    | <i>An.<br/>stephensi</i> | Hap 2 |

|        |        |        |                         |       |
|--------|--------|--------|-------------------------|-------|
| KE9NBX | Larvae | Apr-24 | An.<br><i>stephensi</i> | Hap 2 |
| KE9NBZ | Larvae | Apr-24 | An.<br><i>stephensi</i> | Hap 2 |
| KE9NC7 | Larvae | Apr-24 | An.<br><i>stephensi</i> | Hap 2 |
| KE9NDD | Larvae | Apr-24 | An.<br><i>stephensi</i> | Hap 2 |
| KE9NDE | Larvae | Apr-24 | An.<br><i>stephensi</i> | Hap 2 |
| KE9NDJ | Larvae | Apr-24 | An.<br><i>stephensi</i> | Hap 2 |
| KE9NDM | Larvae | Apr-24 | An.<br><i>stephensi</i> | Hap 2 |
| KE9N6J | Larvae | Mar-24 | An.<br><i>stephensi</i> | Hap 2 |
| KE9N6K | Larvae | Mar-24 | An.<br><i>stephensi</i> | Hap 2 |
| KE9NBR | Larvae | Mar-24 | An.<br><i>stephensi</i> | Hap 2 |
| KE9NBT | Larvae | Mar-24 | An.<br><i>stephensi</i> | Hap 2 |
| KE9NDQ | Larvae | Mar-24 | An.<br><i>stephensi</i> | Hap 2 |
| KE9NDR | Larvae | Mar-24 | An.<br><i>stephensi</i> | Hap 2 |
| KE9NDS | Larvae | Mar-24 | An.<br><i>stephensi</i> | Hap 2 |
| KE9NDW | Larvae | Mar-24 | An.<br><i>stephensi</i> | Hap 2 |
| KE9O88 | Larvae | Mar-24 | An.<br><i>stephensi</i> | Hap 2 |
| KE9O9H | Larvae | Mar-24 | An.<br><i>stephensi</i> | Hap 2 |
| KE9O9I | Larvae | Mar-24 | An.<br><i>stephensi</i> | Hap 2 |
| KE9O9N | Larvae | Mar-24 | An.<br><i>stephensi</i> | Hap 2 |

Additional File 3

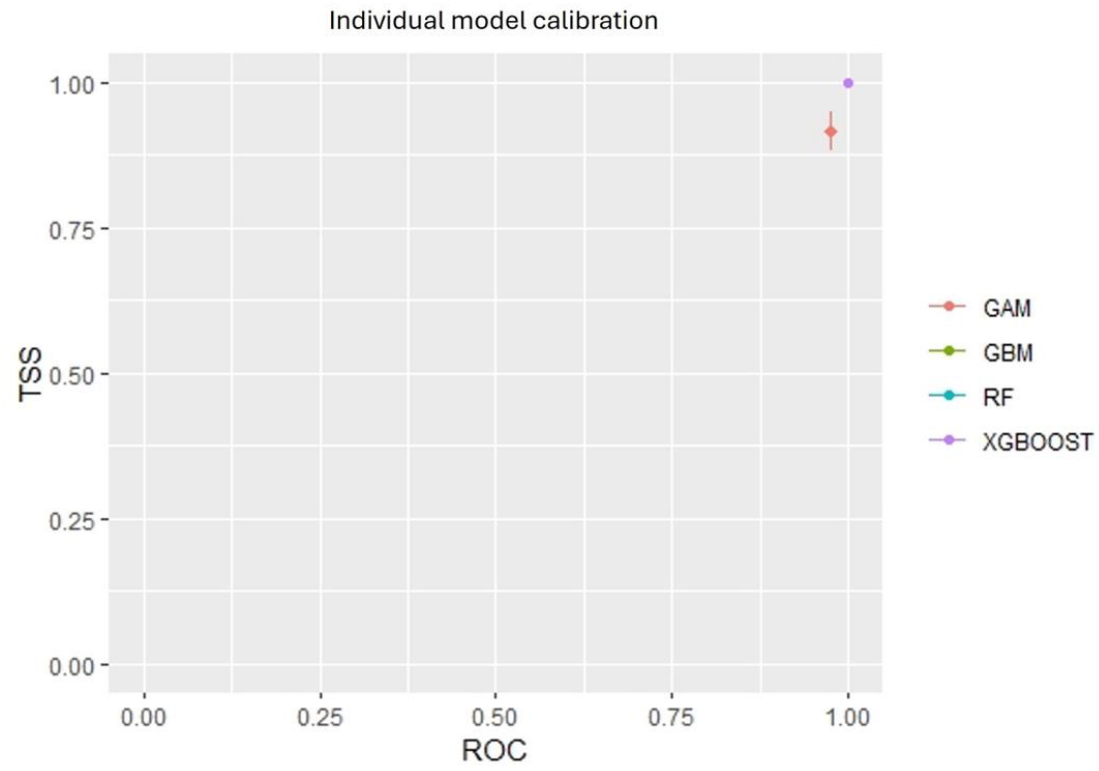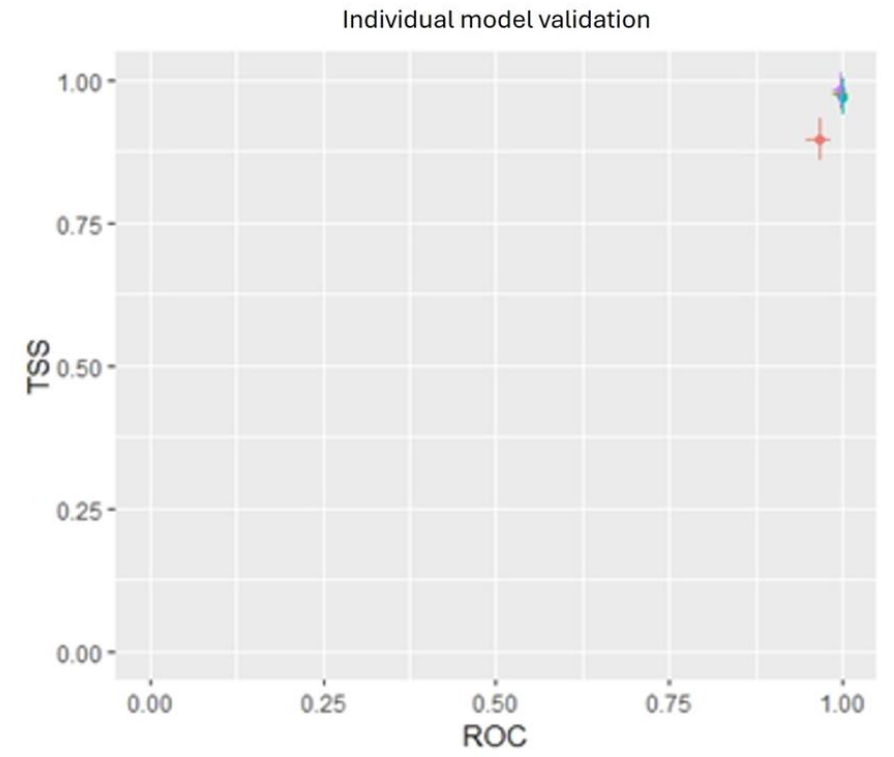

Supplement: Supplementary file 1 [file 895c4a37d11d6e961f07ac27.pdf]
